# Supplementary material
Source: PubMed Central journal article supplement (PMC5729115)
Supplement: NIHMS908495-supplement-Supp_FigS1.pdf [file NIHMS908495-supplement-Supp_FigS1.pdf]

## 16p11.2 Deletion Syndrome Mice Perseverate with Active Coping Response to Acute Stress - Rescue by Blocking 5-HT<sub>2A</sub> Receptors

Chris M. Panzini, Daniel G. Ehlinger Ph.D., Adele M. Alchahin, Yueping Guo, M.D.<sup>1</sup> and Kathryn G. Commons Ph.D.

### Supplemental Figure 1

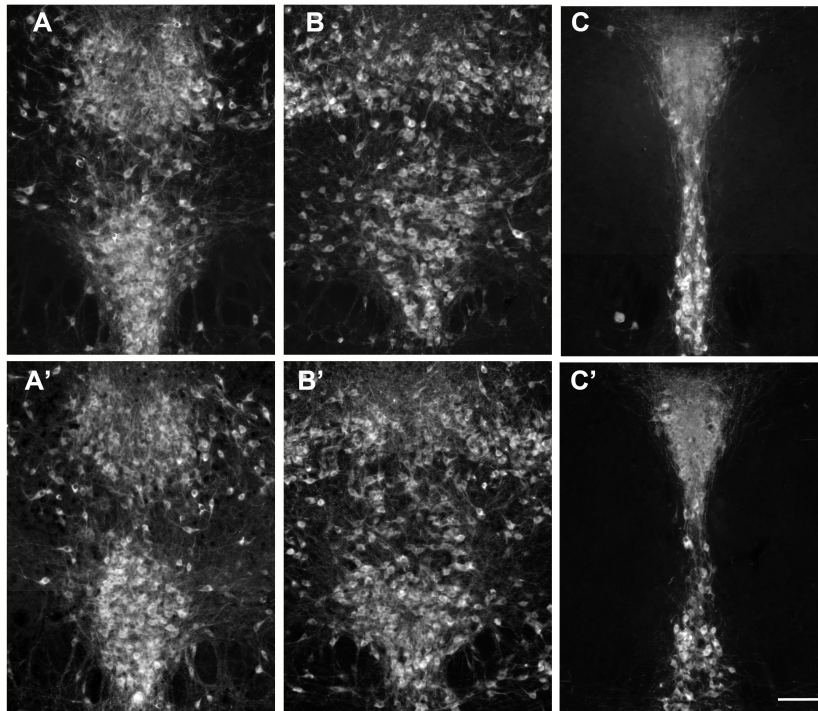

### WT vs. Del- 5-HT Neuron/Section

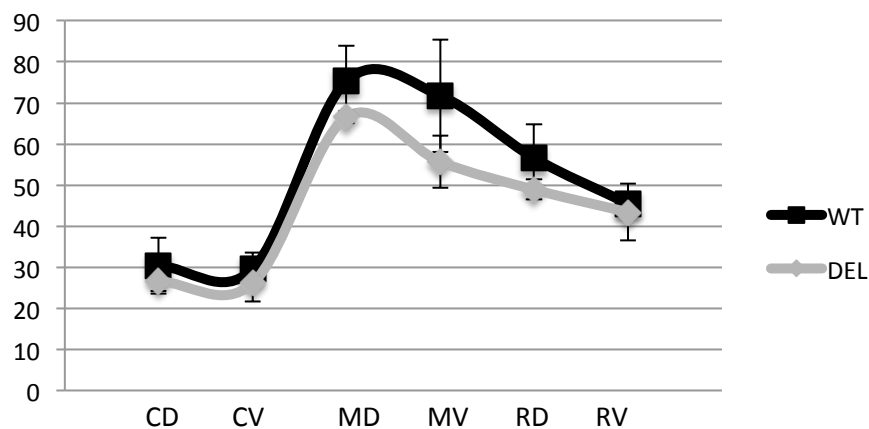

Cytoarchitecture of the dorsal raphe nucleus from rostral to caudal in WT (A, B, C) and Del (A', B', C') reveals no obvious differences by genotype. Quantitative estimates of serotonin neuron number by region (graph below: CD, caudal dorsal; CV, caudal ventral; MD, middle dorsal; MV, middle ventral; RD, rostral dorsal; RV, rostral ventral) shows no significant effect of genotype (n = 6 per genotype).
